# Supplementary material for: Estimation of component reliability from superposed renewal processes by means of latent variables
Source: Springer Nature journal article supplement (doi:10.1007/s00180-021-01124-0), 2021-07-05
Supplement: 180_2021_1124_MOESM1_ESM.pdf [file 180_2021_1124_MOESM1_ESM.pdf]

Supplementary Material for  
“Estimation of component reliability from  
superposed renewal processes by means of  
latent variables”

Rodrigues, Agatha S. (Department of Statistics, Federal University  
of Espirito Santo, Vitoria, ES, Brazil) - agatha.rodrigues@ufes.br

Kerschke, Pascal (Information Systems and Statistics, University of Münster,  
48149 Münster, Germany)

Pereira, Carlos A. de B. (Institute of Mathematics and Statistics,  
University of São Paulo, São Paulo, SP, Brazil)

Trautmann, Heike (Information Systems and Statistics, University of Münster,  
48149 Münster, Germany)

Wagner, Carolin (Information Systems and Supply Chain Management,  
University of Münster, 48149 Münster, Germany)

Hellingrath, Bernd (Information Systems and Supply Chain Management,  
University of Münster, 48149 Münster, Germany)

Polpo, Adriano (Western Australia University, Perth, Australia.)

Journal: Computational Statistics

This supplementary material was built to assist the content of the article “Estimation of component reliability from superposed renewal processes by means of latent variables”. Section 1 presents the distribution of the latent indicator vector ( $\mathbf{d}$ ) conditional to the observed data ( $\mathcal{T}$ ) in a case that there are five failures ( $r_i = 5$ ). Section 2 presents the study of the number of Monte Carlo samples in the EM-algorithm.

# 1 Conditional distribution of $\mathbf{d}$ for $r_i = 5$

For a fixed  $i$ ,  $f(\mathbf{d}_i | \mathcal{T}_i)$  can be written as

$$\begin{aligned} f(\mathbf{d}_i | \mathcal{T}_i) &= f(d_{1i}, d_{2i}, \dots, d_{r_i i} | \mathcal{T}_i) \\ &= f(d_{r_i i} | \mathcal{T}_i, d_{(r_i-1)i}, d_{(r_i-2)i}, \dots, d_{2i}, d_{1i}) f(d_{(r_i-1)i} | \mathcal{T}_i, d_{(r_i-2)i}, \dots, d_{2i}, d_{1i}) \\ &\quad \times \dots \times f(d_{2i} | \mathcal{T}_i, d_{1i}) f(d_{1i} | \mathcal{T}_i). \end{aligned} \quad (1)$$

The conditional distribution of  $d$  given  $\mathcal{T}$  is presented in (1) for any number of failures  $r_i \geq 1$ . In order to present the idea, consider a particular case with  $r_i = 5$  as an example. Thus,  $\mathcal{T}_i = (t_{1i}, t_{2i}, t_{3i}, t_{4i}, t_{5i}, \tau_i)$  and

$$\begin{aligned} f(\mathbf{d}_i | \mathcal{T}_i) &= f(d_{1i}, d_{2i}, d_{3i}, d_{4i}, d_{5i} | \mathcal{T}_i) \\ &= f(d_{5i} | \mathcal{T}_i, d_{4i}, d_{3i}, d_{2i}, d_{1i}) f(d_{4i} | \mathcal{T}_i, d_{3i}, d_{2i}, d_{1i}) \\ &\quad f(d_{3i} | \mathcal{T}_i, d_{2i}, d_{1i}) f(d_{2i} | \mathcal{T}_i, d_{1i}) f(d_{1i} | \mathcal{T}_i). \end{aligned} \quad (2)$$

One comment is important to point: when we develop the distribution of  $d_{vi}$  conditional to the distribution of the indicator of the socket that each previous failure occurred, that is, conditional to  $(d_{(v-1)i}, d_{(v-1)i}, \dots, d_{2i}, d_{1i})$ , with  $v = 2, \dots, m$ , one only needs to worry about the number of sockets that the previous failures occurred and the index of the last failure that occurred in each socket that had failure, regardless the socket index, because we are assuming the lifetime distributions of the components at the sockets are i.i.d.

The development of each term of the right side of the Equation (2) is presented in the following.

## 1.1 The conditional density function $f(d_{1i} | \mathcal{T}_i)$

Under i.i.d assumption, the distribution of  $d_{1i} = j | \mathcal{T}_i$  follows a Multinomial distribution,  $Multin(1, \mathbf{p}_{1i})$ , with  $\mathbf{p}_{1i} = (p_{11i}, \dots, p_{1mi})$  and  $p_{1ji} = 1/m$ ,  $j = 1, \dots, m$ . Note that in this case, the multinomial distribution equals a discrete uniform distribution.

## 1.2 The conditional density function $f(d_{2i} | \mathcal{T}_i, d_{1i})$

The distribution of  $d_{2i}$  conditional to the socket that first failure occurred, say at the socket  $j$  (any  $j \in \{1, \dots, m\}$ ), can be described as follows:

$$f(d_{2i} | \mathcal{T}_i, d_{1i} = j) \propto [f(t_{2i} - t_{1i})]^{I(d_{2i}=j)} \prod_{l=1; l \neq j}^m [f(t_{2i})]^{I(d_{2i}=l)},$$

that is,  $d_{2i} | (\mathbf{t}_i, d_{1i} = j)$  follows  $Multin(1, \mathbf{p}_{2i})$ , in which  $\mathbf{p}_{2i} = (p_{21i}, \dots, p_{2mi})$ ,  $p_{2ji} = f(t_{2i} - t_{1i})/C$  and  $p_{2li} = f(t_{2i})/C$ ,  $l = 1, \dots, m$  and  $l \neq j$ , with  $C = f(t_{2i} - t_{1i}) + (m - 1)f(t_{2i})$ .

### 1.3 The conditional density function $f(d_{3i} \mid \mathcal{T}_i, d_{2i}, d_{1i})$

Now we need to specify the distribution of  $d_{3i}$  conditional to the values assumed by  $d_{2i}$  and  $d_{1i}$ . For that, one has to consider the following two situations (Figure 1): 1) the first failure occurs at a given socket, say at the socket  $j$ , and the second failure also occurs at the socket  $j$  (Figure 1a); and 2) the first failure occurs at a given socket, say at the socket  $j$ , and the second failure occurs in a different socket, say at the socket  $q$  (Figure 1b), with  $j \neq q$ ,  $j = 1, \dots, m$  and  $q = 1, \dots, m$ .

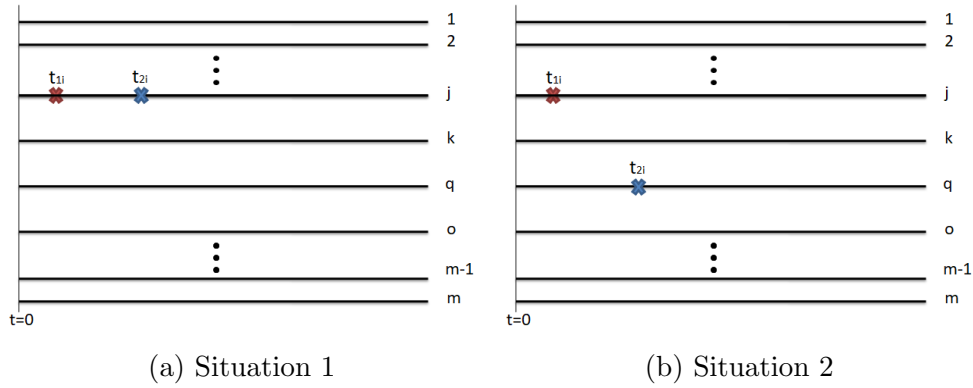

Figure 1: The two possible situations of how two failures can occur in the sockets.

So, depending on each situation, the conditional distribution of  $d_{3i}$  is given by:

- Situation 1: distribution of  $d_{3i} \mid (\mathcal{T}_i, d_{1i} = j, d_{2i} = j)$ :

$$f(d_{3i} \mid \mathcal{T}_i, d_{1i} = j, d_{2i} = j) \propto [f(t_{3i} - t_{2i})]^{I(d_{3i}=j)} \prod_{l=1; l \neq j}^m [f(t_{3i})]^{I(d_{3i}=l)},$$

that is,  $d_{3i} \mid (\mathcal{T}_i, d_{1i} = j, d_{2i} = j)$  follows  $Multin(1, \mathbf{p}_{3i})$ , in which  $\mathbf{p}_{3i} = (p_{31i}, \dots, p_{3mi})$ ,  $p_{3ji} = f(t_{3i} - t_{2i})/C$  and  $p_{3li} = f(t_{3i})/C$ ,  $l = 1, \dots, m$  and  $l \neq j$ , with  $C = f(t_{3i} - t_{2i}) + (m - 1)f(t_{3i})$ .

- Situation 2: distribution of  $d_{3i} \mid (\mathcal{T}_i, d_{1i} = j, d_{2i} = q)$ , with  $q \neq j$ :

$$f(d_{3i} \mid \mathcal{T}_i, d_{1i} = j, d_{2i} = q) \propto [f(t_{3i} - t_{1i})]^{I(d_{3i}=j)} [f(t_{3i} - t_{2i})]^{I(d_{3i}=q)} \times \prod_{l=1; l \neq j, q}^m [f(t_{3i})]^{I(d_{3i}=l)},$$

that is,  $d_{3i} \mid (\mathcal{T}_i, d_{1i} = j, d_{2i} = q)$  follows  $Multin(1, \mathbf{p}_{3i})$ , in which  $\mathbf{p}_{3i} = (p_{31i}, \dots, p_{3mi})$ ,  $p_{3ji} = f(t_{3i} - t_{1i})/C$ ,  $p_{3qi} = f(t_{3i} - t_{2i})/C$  and  $p_{3li} = f(t_{3i})/C$ ,  $l = 1, \dots, m$  and  $l \neq j, q$ , with  $C = f(t_{3i} - t_{1i}) + f(t_{3i} - t_{2i}) + (m - 2)f(t_{3i})$ .

#### 1.4 The conditional density function $f(d_{4i} \mid \mathcal{T}_i, d_{3i}, d_{2i}, d_{1i})$

To specify the distribution of  $d_{4i}$  conditional to the values assumed by  $d_{3i}$ ,  $d_{2i}$  and  $d_{1i}$ , one has to consider the five situations of how three failures can occur up to three sockets (regardless of which sockets they are), illustrated at Figure 2. They are: 1) all three failures occur at a same socket, say at the socket  $j$  (Figure 2a); 2) the first and the second failures occur at a same socket, say at the socket  $j$ , and the third failure occurs in a different socket, say at the socket  $q$ , with  $j \neq q$  (Figure 2b); 3) the first failure occurs at a given socket, say at the socket  $j$ , the second failure occurs in a different socket, say at the socket  $q$ , and the third failure occurs at the same socket that occurred the first failure (Figure 2c); 4) the first failure occurs at a given socket, say at the socket  $j$ , and the second failure occurs in a different socket, say at the socket  $q$ , and the third failure occurs at the same socket that occurred the second failure (Figure 2d); 5) each failure occurs in three different sockets (Figure 2e), say that the first failure occurs at socket  $j$ , the second occurs at socket  $q$  and third failure occurs at socket  $k$ , with  $j \neq q \neq k$ ,  $j = 1, \dots, m$ ,  $q = 1, \dots, m$  and  $k = 1, \dots, m$ .

So, depending on each situation, the conditional distribution of  $d_{4i}$  is given by:

- Situation 1: distribution of  $d_{4i} \mid (\mathcal{T}_i, d_{1i} = j, d_{2i} = j, d_{3i} = j)$ :

$$f(d_{4i} \mid \mathcal{T}_i, d_{1i} = j, d_{2i} = j, d_{3i} = j) \propto [f(t_{4i} - t_{3i})]^{I(d_{4i}=j)} \prod_{l=1; l \neq j}^m [f(t_{4i})]^{I(d_{4i}=l)},$$

that is,  $d_{4i} \mid (\mathcal{T}_i, d_{1i} = j, d_{2i} = j, d_{3i} = j)$  follows  $Multin(1, \mathbf{p}_{4i})$ , in which  $\mathbf{p}_{4i} = (p_{41i}, \dots, p_{4mi})$ ,  $p_{4ji} = f(t_{4i} - t_{3i})/C$  and  $p_{4li} = f(t_{4i})/C$ ,  $l = 1, \dots, m$  and  $l \neq j$ , with  $C = f(t_{4i} - t_{3i}) + (m - 1)f(t_{4i})$ .

- Situation 2: distribution of  $d_{4i} \mid (\mathcal{T}_i, d_{1i} = j, d_{2i} = j, d_{3i} = q)$ , with  $q \neq j$ :

$$f(d_{4i} \mid \mathcal{T}_i, d_{1i} = j, d_{2i} = j, d_{3i} = q) \propto [f(t_{4i} - t_{2i})]^{I(d_{4i}=j)} [f(t_{4i} - t_{3i})]^{I(d_{4i}=q)} \\ \times \prod_{l=1; l \neq j, q}^m [f(t_{4i})]^{I(d_{4i}=l)},$$

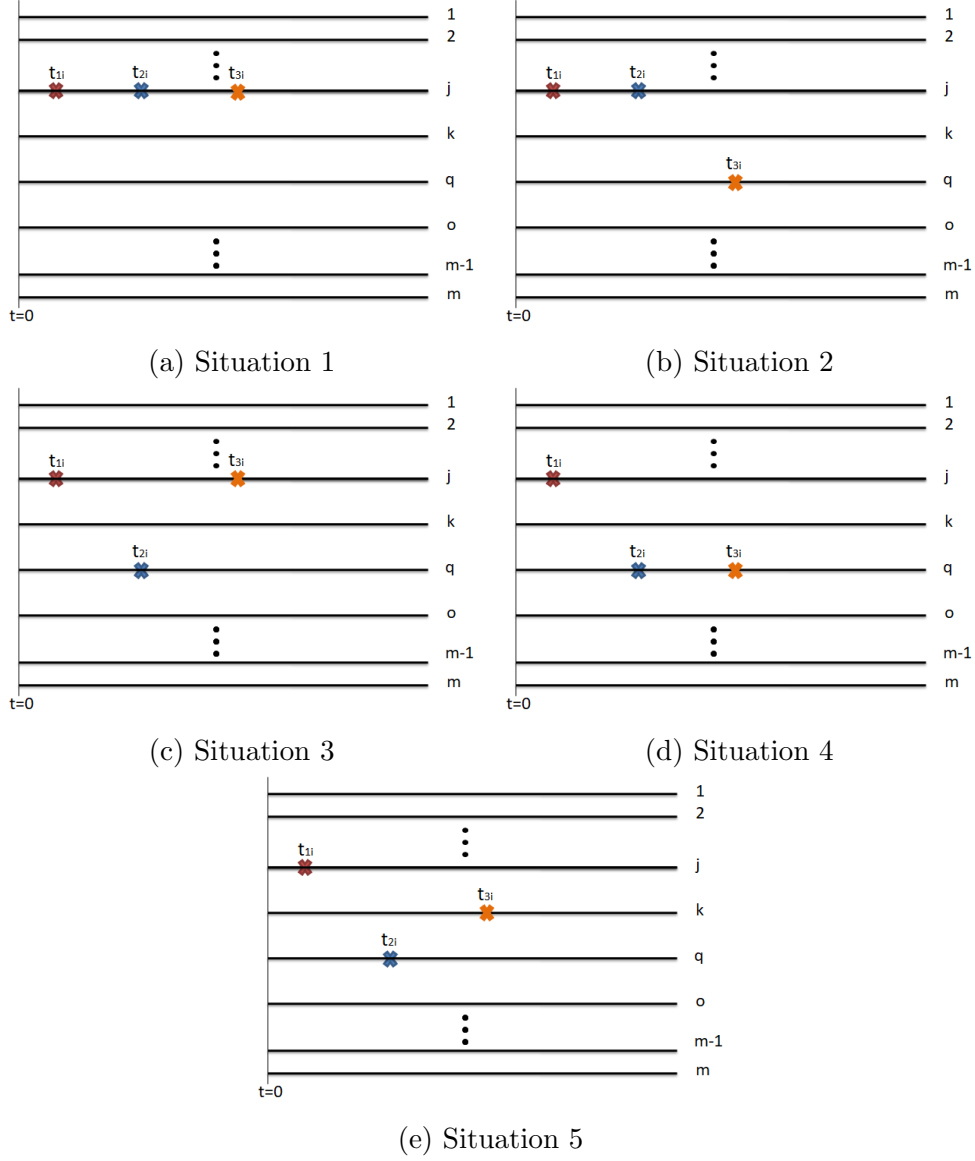

Figure 2: The five possible situations of how three failures can occur in the sockets.

that is,  $d_{4i} \mid (\mathcal{T}_i, d_{1i} = j, d_{2i} = j, d_{3i} = q)$  follows  $Multin(1, \mathbf{p}_{4i})$ , in which  $\mathbf{p}_{4i} = (p_{41i}, \dots, p_{4mi})$ ,  $p_{4ji} = f(t_{4i} - t_{2i})/C$ ,  $p_{4qi} = f(t_{4i} - t_{3i})/C$  and  $p_{4li} = f(t_{4i})/C$ ,  $l = 1, \dots, m$  and  $l \neq j, q$ , with  $C = f(t_{4i} - t_{2i}) + f(t_{4i} - t_{3i}) + (m - 2)f(t_{4i})$ .

- Situation 3: distribution of  $d_{4i} \mid (\mathcal{T}_i, d_{1i} = j, d_{2i} = q, d_{3i} = j)$ , with

$q \neq j$ :

$$f(d_{4i} \mid \mathcal{T}_i, d_{1i} = j, d_{2i} = q, d_{3i} = j) \propto [f(t_{4i} - t_{3i})]^{I(d_{4i}=j)} [f(t_{4i} - t_{2i})]^{I(d_{4i}=q)} \\ \times \prod_{l=1; l \neq j, q}^m [f(t_{4i})]^{I(d_{4i}=l)},$$

that is,  $d_{4i} \mid (\mathcal{T}_i, d_{1i} = j, d_{2i} = q, d_{3i} = j)$  follows  $Multin(1, \mathbf{p}_{4i})$ , in which  $\mathbf{p}_{4i} = (p_{41i}, \dots, p_{4mi})$ ,  $p_{4ji} = f(t_{4i} - t_{3i})/C$ ,  $p_{4qi} = f(t_{4i} - t_{2i})/C$  and  $p_{4li} = f(t_{4i})/C$ ,  $l = 1, \dots, m$  and  $l \neq j, q$ , with  $C = f(t_{4i} - t_{3i}) + f(t_{4i} - t_{2i}) + (m - 2)f(t_{4i})$ .

- Situation 4: distribution of  $d_{4i} \mid (\mathcal{T}_i, d_{1i} = j, d_{2i} = q, d_{3i} = q)$ , with  $q \neq j$ :

$$f(d_{4i} \mid \mathcal{T}_i, d_{1i} = j, d_{2i} = q, d_{3i} = q) \propto [f(t_{4i} - t_{1i})]^{I(d_{4i}=j)} [f(t_{4i} - t_{3i})]^{I(d_{4i}=q)} \\ \times \prod_{l=1; l \neq j, q}^m [f(t_{4i})]^{I(d_{4i}=l)},$$

that is,  $d_{4i} \mid (\mathcal{T}_i, d_{1i} = j, d_{2i} = q, d_{3i} = q)$  follows  $Multin(1, \mathbf{p}_{4i})$ , in which  $\mathbf{p}_{4i} = (p_{41i}, \dots, p_{4mi})$ ,  $p_{4ji} = f(t_{4i} - t_{1i})/C$ ,  $p_{4qi} = f(t_{4i} - t_{3i})/C$  and  $p_{4li} = f(t_{4i})/C$ ,  $l = 1, \dots, m$  and  $l \neq j, q$ , with  $C = f(t_{4i} - t_{1i}) + f(t_{4i} - t_{3i}) + (m - 2)f(t_{4i})$ .

- Situation 5: distribution of  $d_{4i} \mid (\mathcal{T}_i, d_{1i} = j, d_{2i} = q, d_{3i} = k)$ , with  $q \neq j \neq k$ :

$$f(d_{4i} \mid \mathcal{T}_i, d_{1i} = j, d_{2i} = q, d_{3i} = k) \propto [f(t_{4i} - t_{1i})]^{I(d_{4i}=j)} [f(t_{4i} - t_{2i})]^{I(d_{4i}=q)} \\ \times [f(t_{4i} - t_{3i})]^{I(d_{4i}=k)} \prod_{l=1; l \neq j, q, k}^m [f(t_{4i})]^{I(d_{4i}=l)},$$

that is,  $d_{4i} \mid (\mathcal{T}_i, d_{1i} = j, d_{2i} = q, d_{3i} = k)$  follows  $Multin(1, \mathbf{p}_{4i})$ , in which  $\mathbf{p}_{4i} = (p_{41i}, \dots, p_{4mi})$ ,  $p_{4ji} = f(t_{4i} - t_{1i})/C$ ,  $p_{4qi} = f(t_{4i} - t_{2i})/C$ ,  $p_{4ki} = f(t_{4i} - t_{3i})/C$  and  $p_{4li} = f(t_{4i})/C$ ,  $l = 1, \dots, m$  and  $l \neq j, q, k$ , with  $C = f(t_{4i} - t_{1i}) + f(t_{4i} - t_{2i}) + f(t_{4i} - t_{3i}) + (m - 3)f(t_{4i})$ .

Since the socket index does not matter (we have the i.i.d. assumption), the situations 2 and 3 present the same contribution for the conditional distribution of  $f(d_{4i} \mid \mathcal{T}_i, d_{3i}, d_{2i}, d_{1i})$ .

## 1.5 The conditional density function $f(d_{5i} \mid \mathcal{T}_i, d_{4i}, d_{3i}, d_{2i}, d_{1i})$

To specify the distribution of  $d_{5i}$  conditional to the values assumed by  $d_{4i}$ ,  $d_{3i}$ ,  $d_{2i}$  and  $d_{1i}$ , one has to consider the fifteen situations of how four failures can occur up to four sockets (regardless of which sockets they are), illustrated at Figures 3 and 4. They are: 1) all four failures occur at the same socket, say at the socket  $j$  (Figure 3a); 2) the first failure occurs at a given socket, say at the socket  $j$ , and the second failure occurs in a different socket, say at the socket  $q$ , and the third and fourth failures occur at the same socket that occurred the first failure (Figure 3b); 3) the first and the second failures occur at a same socket, say at the socket  $j$ , and the third failure occurs in a different socket, say at the socket  $q$ , and fourth failure occurs at the same socket that occurred the first and second failures (Figure 3c); 4) the first, the second and the third failures occur at a same socket, say at the socket  $j$ , and the fourth failure occurs in a different socket, say at the socket  $q$  (Figure 3d); 5) the first failure occurs at a given socket, say at the socket  $j$ , and the remaining failures occur in a different socket, say at the socket  $q$  (Figure 3e); 6) the first and the second failures occur at the same socket, say at the socket  $j$ , and the third and the fourth failures occur in a different socket, say at the socket  $q$  (Figure 3f); 7) the first failure occurs at a given socket, say socket  $j$ , and the second failure occurs in a different socket, say at the socket  $q$ , and the third failure occurs at the same socket that occurred the first failure and the fourth failure occurs at the same socket that occurred the second failure (Figure 3g); 8) the first failure occurs at a given socket, say socket  $j$ , and the second and the third failures occur in a different socket, say at the socket  $q$ , and the fourth failure occurs at the same socket that occurred the first failure (Figure 3h); 9) the first and the second failures occur at the same socket, say at the socket  $j$ , and the third failure occurs in a different socket, say at the socket  $q$ , and the fourth failure occurs in a socket that there is no previous failure, say at the socket  $k$  (Figure 4a); 10) the first failure occurs at a given socket, say socket  $j$ , and the second failure occurs in a different socket, say at the socket  $q$ , and the third failure occurs at the same socket that occurred the first failure and the fourth failure occurs in a socket that there is no previous failure, say at the socket  $k$  (Figure 4b); 11) the first failure occurs at a given socket, say socket  $j$ , and the second failure occurs in a different socket, say at the socket  $q$ , and the third failure occurs in a socket that there is no previous failure, say at the socket  $k$ , and the fourth failure occurs at the same socket that occurred the first failure (Figure 4c); 12) the first failure occurs at a given socket, say at the socket  $j$ , and the second and the third failures occur in a different socket, say at the socket  $q$ , and the fourth failure occurs in a socket that there is no previous failure, say at the

socket  $k$  (Figure 4d); 13) the first failure occurs at a given socket, say socket  $j$ , and the second failure occurs in a different socket, say at the socket  $q$ , and the third failure occurs in a socket that there is no previous failure, say at the socket  $k$ , and the fourth failure occurs at the same socket that occurred the second failure (Figure 4e); 14) the first failure occurs at a given socket, say at the socket  $j$ , and the second failure occurs in a different socket, say at the socket  $q$ , and the third failure and fourth failures occur in a socket that there is no previous failure, say at the socket  $k$  (Figure 4f); 15) each failure occurs in four different sockets (Figure 4g), say that the first failure occurs at socket  $j$ , the second failure occurs at the socket  $q$ , the third failure occurs at socket  $k$  and the fourth failure occurs at the socket  $o$ , with  $j \neq q \neq k \neq o$ ,  $j = 1, \dots, m$ ,  $q = 1, \dots, m$ ,  $k = 1, \dots, m$  and  $o = 1, \dots, m$ .

So, depending on each situation, the conditional distribution of  $d_{5i}$  is given by:

- Situation 1: distribution of  $d_{5i} \mid (\mathcal{T}_i, d_{1i} = j, d_{2i} = j, d_{3i} = j, d_{4i} = j)$ :

$$f(d_{5i} \mid \mathcal{T}_i, d_{1i} = j, d_{2i} = j, d_{3i} = j, d_{4i} = j) \propto [f(t_{5i} - t_{4i})]^{I(d_{5i}=j)} \times \prod_{l=1; l \neq j}^m [f(t_{5i})]^{I(d_{5i}=l)},$$

that is,  $d_{5i} \mid (\mathcal{T}_i, d_{1i} = j, d_{2i} = j, d_{3i} = j, d_{4i} = j)$  follows  $Multin(1, \mathbf{p}_{5i})$ , in which  $\mathbf{p}_{5i} = (p_{51i}, \dots, p_{5mi})$ ,  $p_{5ji} = f(t_{5i} - t_{4i})/C$  and  $p_{5li} = f(t_{5i})/C$ ,  $l = 1, \dots, m$  and  $l \neq j$ , with  $C = f(t_{5i} - t_{4i}) + (m - 1)f(t_{5i})$ .

- Situation 2: distribution of  $d_{5i} \mid (\mathcal{T}_i, d_{1i} = j, d_{2i} = q, d_{3i} = j, d_{4i} = j)$ , with  $q \neq j$ :

$$f(d_{5i} \mid \mathcal{T}_i, d_{1i} = j, d_{2i} = q, d_{3i} = j, d_{4i} = j) \propto [f(t_{5i} - t_{4i})]^{I(d_{5i}=j)} \times [f(t_{5i} - t_{2i})]^{I(d_{5i}=q)} \prod_{l=1; l \neq j, q}^m [f(t_{5i})]^{I(d_{5i}=l)},$$

that is,  $d_{5i} \mid (\mathcal{T}_i, d_{1i} = j, d_{2i} = q, d_{3i} = j, d_{4i} = j)$  follows  $Multin(1, \mathbf{p}_{5i})$ , in which  $\mathbf{p}_{5i} = (p_{51i}, \dots, p_{5mi})$ ,  $p_{5ji} = f(t_{5i} - t_{4i})/C$ ,  $p_{5qi} = f(t_{5i} - t_{2i})/C$  and  $p_{5li} = f(t_{5i})/C$ ,  $l = 1, \dots, m$  and  $l \neq j, q$ , with  $C = f(t_{5i} - t_{4i}) + f(t_{5i} - t_{2i}) + (m - 2)f(t_{5i})$ .

- Situation 3: distribution of  $d_{5i} \mid (\mathcal{T}_i, d_{1i} = j, d_{2i} = j, d_{3i} = q, d_{4i} = j)$ , with  $q \neq j$ :

$$f(d_{5i} \mid \mathcal{T}_i, d_{1i} = j, d_{2i} = j, d_{3i} = q, d_{4i} = j) \propto [f(t_{5i} - t_{4i})]^{I(d_{5i}=j)} \times [f(t_{5i} - t_{3i})]^{I(d_{5i}=q)} \prod_{l=1; l \neq j, q}^m [f(t_{5i})]^{I(d_{5i}=l)},$$



that is,  $d_{5i} \mid (\mathcal{T}_i, d_{1i} = j, d_{2i} = j, d_{3i} = q, d_{4i} = j)$  follows  $Multin(1, \mathbf{p}_{5i})$ , in which  $\mathbf{p}_{5i} = (p_{51i}, \dots, p_{5mi})$ ,  $p_{5ji} = f(t_{5i} - t_{4i})/C$ ,  $p_{5qi} = f(t_{5i} - t_{3i})/C$  and  $p_{5li} = f(t_{5i})/C$ ,  $l = 1, \dots, m$  and  $l \neq j, q$ , with  $C = f(t_{5i} - t_{4i}) + f(t_{5i} - t_{3i}) + (m - 2)f(t_{5i})$ .

- Situation 4: distribution of  $d_{5i} \mid (\mathcal{T}_i, d_{1i} = j, d_{2i} = j, d_{3i} = j, d_{4i} = q)$ , with  $q \neq j$ :

$$f(d_{5i} \mid \mathcal{T}_i, d_{1i} = j, d_{2i} = j, d_{3i} = j, d_{4i} = q) \propto [f(t_{5i} - t_{3i})]^{I(d_{5i}=j)} \\ \times [f(t_{5i} - t_{4i})]^{I(d_{5i}=q)} \prod_{l=1; l \neq j, q}^m [f(t_{5i})]^{I(d_{5i}=l)},$$

that is,  $d_{5i} \mid (\mathcal{T}_i, d_{1i} = j, d_{2i} = j, d_{3i} = j, d_{4i} = q)$  follows  $Multin(1, \mathbf{p}_{5i})$ , in which  $\mathbf{p}_{5i} = (p_{51i}, \dots, p_{5mi})$ ,  $p_{5ji} = f(t_{5i} - t_{3i})/C$ ,  $p_{5qi} = f(t_{5i} - t_{4i})/C$  and  $p_{5li} = f(t_{5i})/C$ ,  $l = 1, \dots, m$  and  $l \neq j, q$ , with  $C = f(t_{5i} - t_{3i}) + f(t_{5i} - t_{4i}) + (m - 2)f(t_{5i})$ .

- Situation 5: distribution of  $d_{5i} \mid (\mathcal{T}_i, d_{1i} = j, d_{2i} = q, d_{3i} = q, d_{4i} = q)$ , with  $q \neq j$ :

$$f(d_{5i} \mid \mathcal{T}_i, d_{1i} = j, d_{2i} = q, d_{3i} = q, d_{4i} = q) \propto [f(t_{5i} - t_{1i})]^{I(d_{5i}=i)} \\ \times [f(t_{5i} - t_{4i})]^{I(d_{5i}=q)} \prod_{l=1; l \neq j, q}^m [f(t_{5i})]^{I(d_{5i}=l)},$$

that is,  $d_{5i} \mid (\mathcal{T}_i, d_{1i} = j, d_{2i} = q, d_{3i} = q, d_{4i} = q)$  follows  $Multin(1, \mathbf{p}_{5i})$ , in which  $\mathbf{p}_{5i} = (p_{51i}, \dots, p_{5mi})$ ,  $p_{5ji} = f(t_{5i} - t_{1i})/C$ ,  $p_{5qi} = f(t_{5i} - t_{4i})/C$  and  $p_{5li} = f(t_{5i})/C$ ,  $l = 1, \dots, m$  and  $l \neq j, q$ , with  $C = f(t_{5i} - t_{1i}) + f(t_{5i} - t_{4i}) + (m - 2)f(t_{5i})$ .

- Situation 6: distribution of  $d_{5i} \mid (\mathcal{T}_i, d_{1i} = j, d_{2i} = j, d_{3i} = q, d_{4i} = q)$ , with  $q \neq j$ :

$$f(d_{5i} \mid \mathcal{T}_i, d_{1i} = j, d_{2i} = j, d_{3i} = q, d_{4i} = q) \propto [f(t_{5i} - t_{2i})]^{I(d_{5i}=i)} \\ \times [f(t_{5i} - t_{4i})]^{I(d_{5i}=q)} \prod_{l=1; l \neq j, q}^m [f(t_{5i})]^{I(d_{5i}=l)},$$

that is,  $d_{5i} \mid (\mathcal{T}_i, d_{1i} = j, d_{2i} = j, d_{3i} = q, d_{4i} = q)$  follows  $Multin(1, \mathbf{p}_{5i})$ , in which  $\mathbf{p}_{5i} = (p_{51i}, \dots, p_{5mi})$ ,  $p_{5ji} = f(t_{5i} - t_{2i})/C$ ,  $p_{5qi} = f(t_{5i} - t_{4i})/C$  and  $p_{5li} = f(t_{5i})/C$ ,  $l = 1, \dots, m$  and  $l \neq j, q$ , with  $C = f(t_{5i} - t_{2i}) + f(t_{5i} - t_{4i}) + (m - 2)f(t_{5i})$ .

- Situation 7: distribution of  $d_{5i} \mid (\mathcal{T}_i, d_{1i} = j, d_{2i} = q, d_{3i} = j, d_{4i} = q)$ , with  $q \neq j$ :

$$f(d_{5i} \mid \mathcal{T}_i, d_{1i} = j, d_{2i} = q, d_{3i} = j, d_{4i} = q) \propto [f(t_{5i} - t_{3i})]^{I(d_{5i}=j)} \\ \times [f(t_{5i} - t_{4i})]^{I(d_{5i}=q)} \prod_{l=1; l \neq j, q}^m [f(t_{5i})]^{I(d_{5i}=l)},$$

that is,  $d_{5i} \mid (\mathcal{T}_i, d_{1i} = j, d_{2i} = q, d_{3i} = j, d_{4i} = q)$  follows *Multin*(1,  $\mathbf{p}_{5i}$ ), in which  $\mathbf{p}_{5i} = (p_{51i}, \dots, p_{5mi})$ ,  $p_{5ji} = f(t_{5i} - t_{3i})/C$ ,  $p_{5qi} = f(t_{5i} - t_{4i})/C$  and  $p_{5li} = f(t_{5i})/C$ ,  $l = 1, \dots, m$  and  $l \neq j, q$ , with  $C = f(t_{5i} - t_{3i}) + f(t_{5i} - t_{4i}) + (m - 2)f(t_{5i})$ .

- Situation 8: distribution of  $d_{5i} \mid (\mathcal{T}_i, d_{1i} = j, d_{2i} = q, d_{3i} = q, d_{4i} = j)$ , with  $q \neq j$ :

$$f(d_{5i} \mid \mathcal{T}_i, d_{1i} = j, d_{2i} = q, d_{3i} = q, d_{4i} = j) \propto [f(t_{5i} - t_{4i})]^{I(d_{5i}=j)} \\ \times [f(t_{5i} - t_{3i})]^{I(d_{5i}=q)} \prod_{l=1; l \neq j, q}^m [f(t_{5i})]^{I(d_{5i}=l)},$$

that is,  $d_{5i} \mid (\mathcal{T}_i, d_{1i} = j, d_{2i} = q, d_{3i} = q, d_{4i} = j)$  follows *Multin*(1,  $\mathbf{p}_{5i}$ ), in which  $\mathbf{p}_{5i} = (p_{51i}, \dots, p_{5mi})$ ,  $p_{5ji} = f(t_{5i} - t_{4i})/C$ ,  $p_{5qi} = f(t_{5i} - t_{3i})/C$  and  $p_{5li} = f(t_{5i})/C$ ,  $l = 1, \dots, m$  and  $l \neq j, q$ , with  $C = f(t_{5i} - t_{4i}) + f(t_{5i} - t_{3i}) + (m - 2)f(t_{5i})$ .

- Situation 9: distribution of  $d_{5i} \mid (\mathcal{T}_i, d_{1i} = j, d_{2i} = j, d_{3i} = q, d_{4i} = k)$ , with  $q \neq j \neq k$ :

$$f(d_{5i} \mid \mathcal{T}_i, d_{1i} = j, d_{2i} = j, d_{3i} = q, d_{4i} = k) \propto [f(t_{5i} - t_{2i})]^{I(d_{5i}=j)} \\ \times [f(t_{5i} - t_{3i})]^{I(d_{5i}=q)} [f(t_{5i} - t_{4i})]^{I(d_{5i}=k)} \prod_{l=1; l \neq j, q, k}^m [f(t_{5i})]^{I(d_{5i}=l)},$$

that is,  $d_{5i} \mid (\mathcal{T}_i, d_{1i} = j, d_{2i} = j, d_{3i} = q, d_{4i} = k)$  follows *Multin*(1,  $\mathbf{p}_{5i}$ ), in which  $\mathbf{p}_{5i} = (p_{51i}, \dots, p_{5mi})$ ,  $p_{5ji} = f(t_{5i} - t_{2i})/C$ ,  $p_{5qi} = f(t_{5i} - t_{3i})/C$ ,  $p_{5ki} = f(t_{5i} - t_{4i})/C$  and  $p_{5li} = f(t_{5i})/C$ ,  $l = 1, \dots, m$  and  $l \neq j, q, k$ , with  $C = f(t_{5i} - t_{2i}) + f(t_{5i} - t_{3i}) + f(t_{5i} - t_{4i}) + (m - 3)f(t_{5i})$ .

- Situation 10: distribution of  $d_{5i} \mid (\mathcal{T}_i, d_{1i} = j, d_{2i} = q, d_{3i} = j, d_{4i} = k)$ , with  $q \neq j \neq k$ :

$$f(d_{5i} \mid \mathcal{T}_i, d_{1i} = j, d_{2i} = q, d_{3i} = j, d_{4i} = k) \propto [f(t_{5i} - t_{3i})]^{I(d_{5i}=j)} \\ \times [f(t_{5i} - t_{2i})]^{I(d_{5i}=q)} [f(t_{5i} - t_{4i})]^{I(d_{5i}=k)} \prod_{l=1; l \neq j, q, k}^m [f(t_{5i})]^{I(d_{5i}=l)},$$

that is,  $d_{5i} \mid (\mathcal{T}_i, d_{1i} = j, d_{2i} = q, d_{3i} = j, d_{4i} = k)$  follows  $Multin(1, \mathbf{p}_{5i})$ , in which  $\mathbf{p}_{5i} = (p_{51i}, \dots, p_{5mi})$ ,  $p_{5ji} = f(t_{5i} - t_{3i})/C$ ,  $p_{5qi} = f(t_{5i} - t_{2i})/C$ ,  $p_{5ki} = f(t_{5i} - t_{4i})/C$  and  $p_{5li} = f(t_{5i})/C$ ,  $l = 1, \dots, m$  and  $l \neq j, q, k$ , with  $C = f(t_{5i} - t_{3i}) + f(t_{5i} - t_{2i}) + f(t_{5i} - t_{4i}) + (m-3)f(t_{5i})$ .

- Situation 11: distribution of  $d_{5i} \mid (\mathcal{T}_i, d_{1i} = j, d_{2i} = q, d_{3i} = k, d_{4i} = j)$ , with  $q \neq j \neq k$ :

$$f(d_{5i} \mid \mathcal{T}_i, d_{1i} = j, d_{2i} = q, d_{3i} = k, d_{4i} = j) \propto [f(t_{5i} - t_{4i})]^{I(d_{5i}=j)} \\ \times [f(t_{5i} - t_{2i})]^{I(d_{5i}=q)} [f(t_{5i} - t_{3i})]^{I(d_{5i}=k)} \prod_{l=1; l \neq j, q, k}^m [f(t_{5i})]^{I(d_{5i}=l)},$$

that is,  $d_{5i} \mid (\mathcal{T}_i, d_{1i} = j, d_{2i} = q, d_{3i} = k, d_{4i} = j)$  follows  $Multin(1, \mathbf{p}_{5i})$ , in which  $\mathbf{p}_{5i} = (p_{51i}, \dots, p_{5mi})$ ,  $p_{5ji} = f(t_{5i} - t_{4i})/C$ ,  $p_{5qi} = f(t_{5i} - t_{2i})/C$ ,  $p_{5ki} = f(t_{5i} - t_{3i})/C$  and  $p_{5li} = f(t_{5i})/C$ ,  $l = 1, \dots, m$  and  $l \neq j, q, k$ , with  $C = f(t_{5i} - t_{4i}) + f(t_{5i} - t_{2i}) + f(t_{5i} - t_{3i}) + (m-3)f(t_{5i})$ .

- Situation 12: distribution of  $d_{5i} \mid (\mathcal{T}_i, d_{1i} = j, d_{2i} = q, d_{3i} = q, d_{4i} = k)$ , with  $q \neq j \neq k$ :

$$f(d_{5i} \mid \mathcal{T}_i, d_{1i} = j, d_{2i} = q, d_{3i} = q, d_{4i} = k) \propto [f(t_{5i} - t_{1i})]^{I(d_{5i}=j)} \\ \times [f(t_{5i} - t_{3i})]^{I(d_{5i}=q)} [f(t_{5i} - t_{4i})]^{I(d_{5i}=k)} \prod_{l=1; l \neq j, q, k}^m [f(t_{5i})]^{I(d_{5i}=l)},$$

that is,  $d_{5i} \mid (\mathcal{T}_i, d_{1i} = j, d_{2i} = q, d_{3i} = q, d_{4i} = k)$  follows  $Multin(1, \mathbf{p}_{5i})$ , in which  $\mathbf{p}_{5i} = (p_{51i}, \dots, p_{5mi})$ ,  $p_{5ji} = f(t_{5i} - t_{1i})/C$ ,  $p_{5qi} = f(t_{5i} - t_{3i})/C$ ,  $p_{5ki} = f(t_{5i} - t_{4i})/C$  and  $p_{5li} = f(t_{5i})/C$ ,  $l = 1, \dots, m$  and  $l \neq j, q, k$ , with  $C = f(t_{5i} - t_{1i}) + f(t_{5i} - t_{3i}) + f(t_{5i} - t_{4i}) + (m-3)f(t_{5i})$ .

- Situation 13: distribution of  $d_{5i} \mid (\mathcal{T}_i, d_{1i} = j, d_{2i} = q, d_{3i} = k, d_{4i} = q)$ , with  $q \neq j \neq k$ :

$$f(d_{5i} \mid \mathcal{T}_i, d_{1i} = j, d_{2i} = q, d_{3i} = k, d_{4i} = q) \propto [f(t_{5i} - t_{1i})]^{I(d_{5i}=j)} \\ \times [f(t_{5i} - t_{4i})]^{I(d_{5i}=q)} [f(t_{5i} - t_{3i})]^{I(d_{5i}=k)} \prod_{l=1; l \neq j, q, k}^m [f(t_{5i})]^{I(d_{5i}=l)},$$

that is,  $d_{5i} \mid (\mathcal{T}_i, d_{1i} = j, d_{2i} = q, d_{3i} = k, d_{4i} = q)$  follows  $Multin(1, \mathbf{p}_{5i})$ , in which  $\mathbf{p}_{5i} = (p_{51i}, \dots, p_{5mi})$ ,  $p_{5ji} = f(t_{5i} - t_{1i})/C$ ,  $p_{5qi} = f(t_{5i} - t_{4i})/C$ ,  $p_{5ki} = f(t_{5i} - t_{3i})/C$  and  $p_{5li} = f(t_{5i})/C$ ,  $l = 1, \dots, m$  and  $l \neq j, q, k$ , with  $C = f(t_{5i} - t_{1i}) + f(t_{5i} - t_{4i}) + f(t_{5i} - t_{3i}) + (m-3)f(t_{5i})$ .

- Situation 14: distribution of  $d_{5i} \mid (\mathcal{T}_i, d_{1i} = j, d_{2i} = q, d_{3i} = k, d_{4i} = k)$ , with  $q \neq j \neq k$ :

$$f(d_{5i} \mid \mathcal{T}_i, d_{1i} = j, d_{2i} = q, d_{3i} = k, d_{4i} = k) \propto [f(t_{5i} - t_{1i})]^{I(d_{5i}=j)} \\ \times [f(t_{5i} - t_{2i})]^{I(d_{5i}=q)} [f(t_{5i} - t_{4i})]^{I(d_{5i}=k)} \prod_{l=1; l \neq j, q, k}^m [f(t_{5i})]^{I(d_{5i}=l)},$$

that is,  $d_{5i} \mid (\mathcal{T}_i, d_{1i} = j, d_{2i} = q, d_{3i} = k, d_{4i} = k)$  follows  $Multin(1, \mathbf{p}_{5i})$ , in which  $\mathbf{p}_{5i} = (p_{51i}, \dots, p_{5mi})$ ,  $p_{5ji} = f(t_{5i} - t_{1i})/C$ ,  $p_{5qi} = f(t_{5i} - t_{2i})/C$ ,  $p_{5ki} = f(t_{5i} - t_{4i})/C$  and  $p_{5li} = f(t_{5i})/C$ ,  $l = 1, \dots, m$  and  $l \neq j, q, k$ , with  $C = f(t_{5i} - t_{1i}) + f(t_{5i} - t_{2i}) + f(t_{5i} - t_{4i}) + (m-3)f(t_{5i})$ .

- Situation 15: distribution of  $d_{5i} \mid (\mathcal{T}_i, d_{1i} = j, d_{2i} = q, d_{3i} = k, d_{4i} = o)$ , with  $q \neq j \neq k \neq o$ :

$$f(d_{5i} \mid \mathcal{T}_i, d_{1i} = j, d_{2i} = q, d_{3i} = k, d_{4i} = o) \propto [f(t_{5i} - t_{1i})]^{I(d_{5i}=j)} \\ \times [f(t_{5i} - t_{2i})]^{I(d_{5i}=q)} [f(t_{5i} - t_{3i})]^{I(d_{5i}=k)} [f(t_{5i} - t_{4i})]^{I(d_{5i}=o)} \\ \times \prod_{l=1; l \neq j, q, k, o}^m [f(t_{5i})]^{I(d_{5i}=l)},$$

that is,  $d_{5i} \mid (\mathcal{T}_i, d_{1i} = j, d_{2i} = q, d_{3i} = k, d_{4i} = o)$  follows  $Multin(1, \mathbf{p}_{5i})$ , in which  $\mathbf{p}_{5i} = (p_{51i}, \dots, p_{5mi})$ ,  $p_{5ji} = f(t_{5i} - t_{1i})/C$ ,  $p_{5qi} = f(t_{5i} - t_{2i})/C$ ,  $p_{5ki} = f(t_{5i} - t_{3i})/C$ ,  $p_{5oi} = f(t_{5i} - t_{4i})/C$  and  $p_{5li} = f(t_{5i})/C$ ,  $l = 1, \dots, m$  and  $l \neq j, q, k, o$ , with  $C = f(t_{5i} - t_{1i}) + f(t_{5i} - t_{2i}) + f(t_{5i} - t_{3i}) + f(t_{5i} - t_{4i}) + (m-4)f(t_{5i})$ .

Since the socket index does not matter (we have the i.i.d. assumption), the situations 2 and 6, the situations 3, 4, 7 and 8, the situations 9, 10 and 11 and the situations 12 and 13 present the same contribution for the conditional distribution of  $f(d_{5i} \mid \mathcal{T}_i, d_{4i}, d_{3i}, d_{2i}, d_{1i})$ .

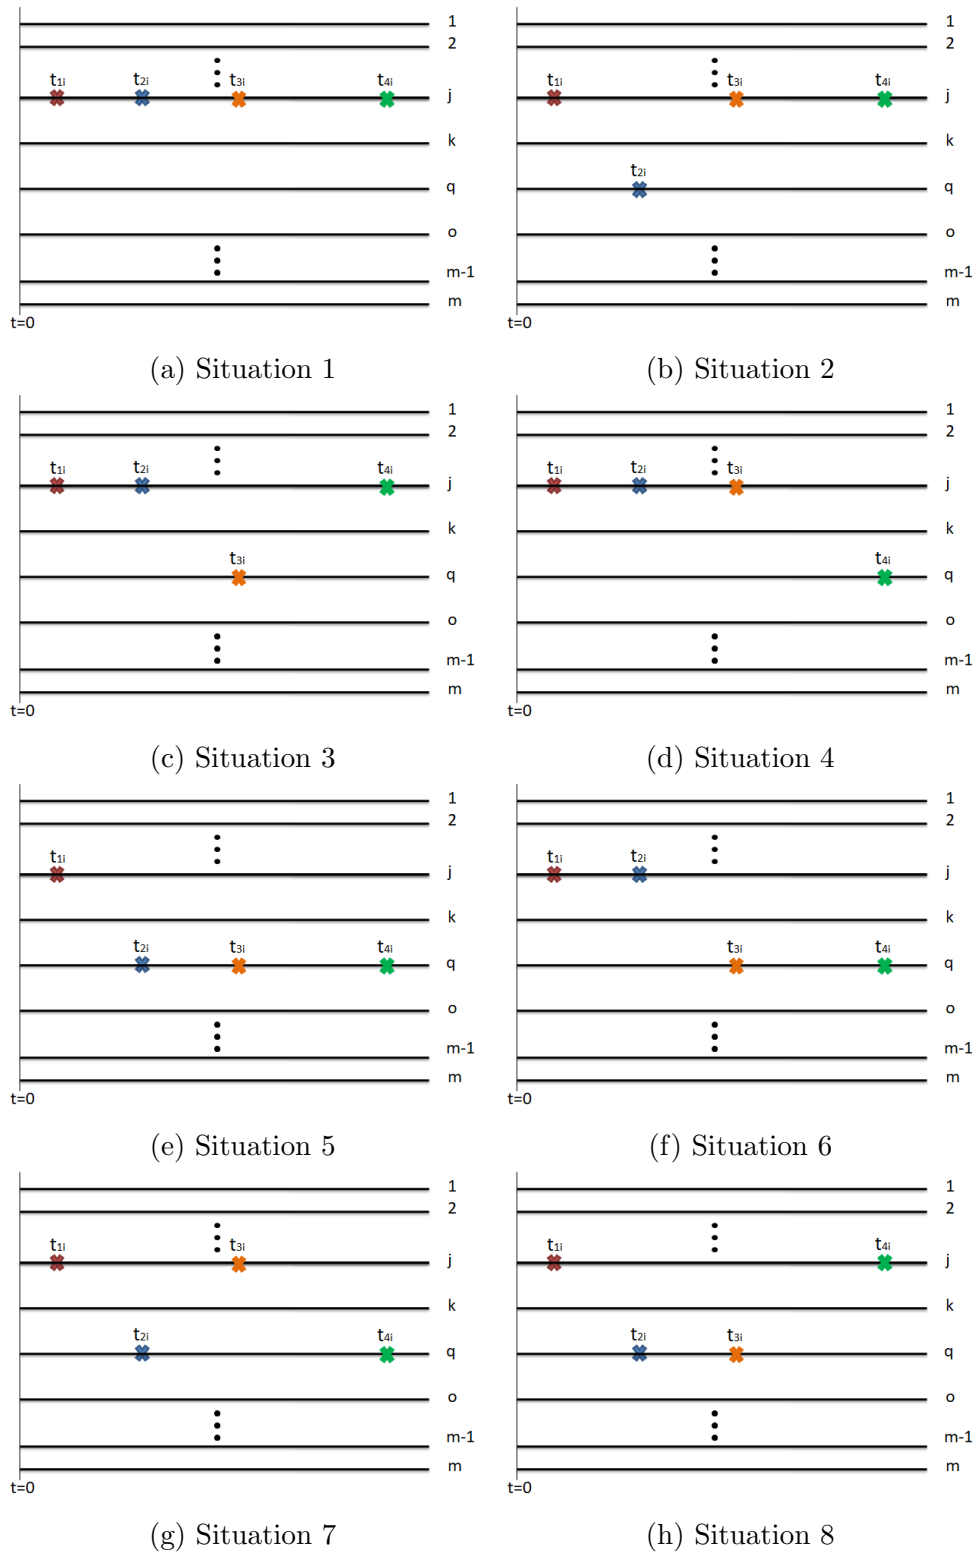

Figure 3: The fifteen possible situations of how four failures can occur in the sockets - 1 to 8.

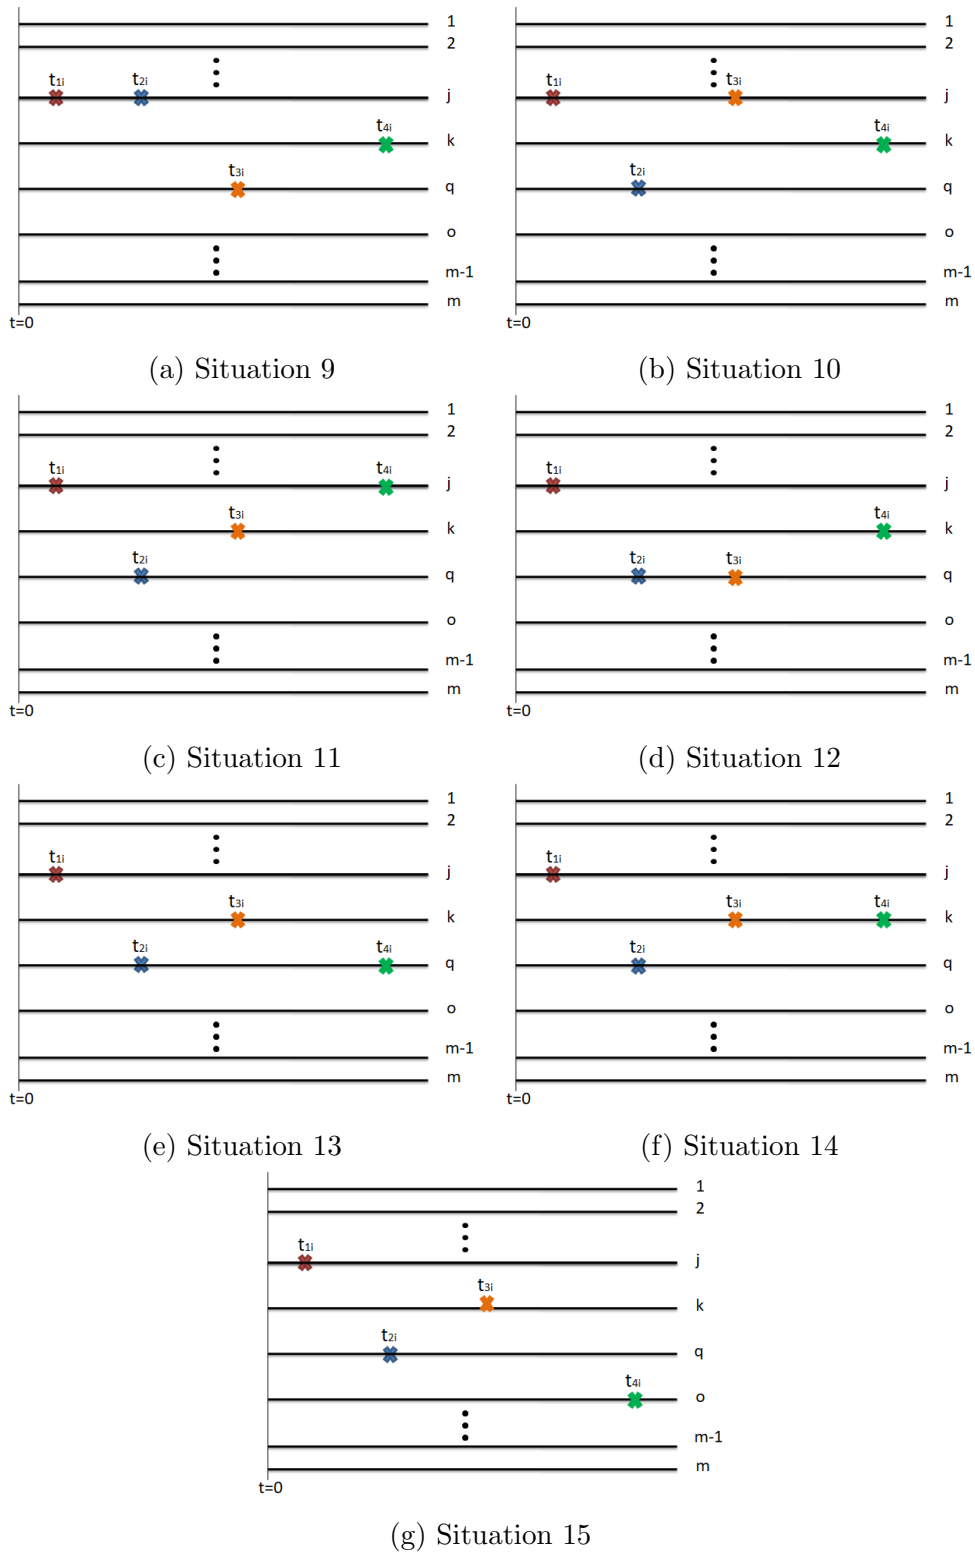

Figure 4: The fifteen possible situations of how four failures can occur in the sockets - 9 to 15.

## 2 Study of the number of Monte Carlo sample

In order to study the impact of the number of Monte Carlo sample on the maximum likelihood estimator via EM algorithm (EM-ML), we conducted the simulations for all combinations of the following features:  $n \in \{10, 50, 100, 200\}$ ,  $m \in \{4, 8, 16, 32\}$ , and  $m_c \in \{4, 8\}$ , resulting in 32 scenarios, in which  $n$  is the sample size,  $m$  is the number of sockets, and  $m_c$  is censoring mean lifetime. For more details about how dataset are generated can be found at Algorithm 2 in the manuscript.

For each scenario, a dataset was generated, and we compare the mean absolute error (MAE) from the estimator resulting from EM-ML to the true distribution. We consider 19 values of Monte Carlo sample, from  $L = 100$  to  $L = 1000$  with a gap of 50 units, that is,  $L \in \{100, 150, 200, \dots, 900, 950, 1000\}$ .

As one can see in Tables 1 and 2 for  $m_c = 4$ , and in Tables 3 and 4 for  $m_c = 8$ , the MAE value is practically the same regardless of the value of  $L$  for all scenarios considered. For this reason, we choose  $L = 100$ .

Table 1: MAE obtained for different values of  $L$  by considering  $m_c = 4$  and the sample sizes  $n = 10$  and  $n = 50$ .

| n=10     |             |             |             |             |
|----------|-------------|-------------|-------------|-------------|
| L values | m = 4       | m = 8       | m = 16      | m = 32      |
| 100      | 0.097054958 | 0.175500734 | 0.039017419 | 0.028261852 |
| 150      | 0.097054958 | 0.175500734 | 0.041307128 | 0.028831198 |
| 200      | 0.097054958 | 0.175500734 | 0.041169920 | 0.028717485 |
| 250      | 0.097054958 | 0.175500734 | 0.039930794 | 0.028359780 |
| 300      | 0.097054958 | 0.175500734 | 0.041254209 | 0.028374573 |
| 350      | 0.097054958 | 0.175500734 | 0.041829177 | 0.028333045 |
| 400      | 0.097054958 | 0.175500734 | 0.042520935 | 0.028383278 |
| 450      | 0.097054958 | 0.175500734 | 0.041046871 | 0.028050760 |
| 500      | 0.097054958 | 0.175500734 | 0.040677652 | 0.027863253 |
| 550      | 0.097054958 | 0.175500734 | 0.041160202 | 0.028546671 |
| 600      | 0.097054958 | 0.175500734 | 0.042929532 | 0.028773057 |
| 650      | 0.097054958 | 0.175500734 | 0.040636138 | 0.028894523 |
| 700      | 0.097054958 | 0.175500734 | 0.041199316 | 0.028191647 |
| 750      | 0.097054958 | 0.175500734 | 0.042168413 | 0.028594575 |
| 800      | 0.097054958 | 0.175500734 | 0.042168460 | 0.028466352 |
| 850      | 0.097054958 | 0.175500734 | 0.040922980 | 0.028375690 |
| 900      | 0.097054958 | 0.175500734 | 0.041212946 | 0.028320464 |
| 950      | 0.097054958 | 0.175500734 | 0.041324984 | 0.028865522 |
| 1000     | 0.097054958 | 0.175500734 | 0.040823293 | 0.028215566 |
| n=50     |             |             |             |             |
| L values | m = 4       | m = 8       | m = 16      | m = 32      |
| 100      | 0.052503099 | 0.026746586 | 0.071195075 | 0.030188679 |
| 150      | 0.052484352 | 0.027169478 | 0.070917475 | 0.031274096 |
| 200      | 0.053104306 | 0.027155158 | 0.070820876 | 0.031520007 |
| 250      | 0.052648328 | 0.028089157 | 0.071161903 | 0.031300216 |
| 300      | 0.053291119 | 0.026710387 | 0.070967350 | 0.031454286 |
| 350      | 0.052314070 | 0.027362181 | 0.070925535 | 0.031315114 |
| 400      | 0.052699837 | 0.026725353 | 0.070944947 | 0.031237881 |
| 450      | 0.052854499 | 0.027266589 | 0.070850462 | 0.031252745 |
| 500      | 0.053047834 | 0.027209117 | 0.070941087 | 0.031160991 |
| 550      | 0.052579583 | 0.026948179 | 0.070931525 | 0.031308010 |
| 600      | 0.052795520 | 0.027135105 | 0.070882863 | 0.031299577 |
| 650      | 0.053333066 | 0.027405817 | 0.071030530 | 0.031359314 |
| 700      | 0.052253845 | 0.027100874 | 0.070852965 | 0.031320288 |
| 750      | 0.052950862 | 0.027200043 | 0.070875773 | 0.031192603 |
| 800      | 0.053211232 | 0.027326351 | 0.070891527 | 0.031334819 |
| 850      | 0.053364006 | 0.027208229 | 0.070795752 | 0.031397174 |
| 900      | 0.052755141 | 0.027153171 | 0.070705550 | 0.031139484 |
| 950      | 0.052739592 | 0.027362893 | 0.070992356 | 0.031270248 |
| 1000     | 0.052739873 | 0.026895496 | 0.071079454 | 0.031334819 |



Table 2: MAE obtained for different values of  $L$  by considering  $m_c = 4$  and the sample sizes  $n = 100$  and  $n = 200$ .

| n=100    |             |             |             |             |
|----------|-------------|-------------|-------------|-------------|
| L values | m = 4       | m = 8       | m = 16      | m = 32      |
| 100      | 0.022839142 | 0.014172490 | 0.057617283 | 0.054777789 |
| 150      | 0.023216644 | 0.014246455 | 0.057392279 | 0.054872264 |
| 200      | 0.023502981 | 0.014523670 | 0.057753581 | 0.054999646 |
| 250      | 0.023754074 | 0.014201453 | 0.057617669 | 0.054802554 |
| 300      | 0.023559074 | 0.014320741 | 0.057553859 | 0.054862170 |
| 350      | 0.023578610 | 0.014242770 | 0.057668731 | 0.054738523 |
| 400      | 0.023347806 | 0.014268691 | 0.057623194 | 0.054983885 |
| 450      | 0.023444192 | 0.014186468 | 0.057623194 | 0.054880744 |
| 500      | 0.023426798 | 0.014364931 | 0.057665162 | 0.054930038 |
| 550      | 0.023540226 | 0.014316386 | 0.057530328 | 0.054684366 |
| 600      | 0.023589652 | 0.014277114 | 0.057688006 | 0.054942658 |
| 650      | 0.023393762 | 0.014371262 | 0.057567588 | 0.054858216 |
| 700      | 0.023549651 | 0.014304628 | 0.057561496 | 0.054833598 |
| 750      | 0.023670828 | 0.014266177 | 0.057607110 | 0.054852143 |
| 800      | 0.023583018 | 0.014327204 | 0.057509242 | 0.054788753 |
| 850      | 0.023724339 | 0.014349209 | 0.057621745 | 0.054894436 |
| 900      | 0.023464710 | 0.014268768 | 0.057513417 | 0.054846108 |
| 950      | 0.023725148 | 0.014302161 | 0.057621745 | 0.054770109 |
| 1000     | 0.023612624 | 0.014422488 | 0.057668731 | 0.054880459 |
| n=200    |             |             |             |             |
| L values | m = 4       | m = 8       | m = 16      | m = 32      |
| 100      | 0.068695347 | 0.049739792 | 0.040244256 | 0.051742457 |
| 150      | 0.068562170 | 0.049702862 | 0.040017403 | 0.051670821 |
| 200      | 0.068780031 | 0.049392601 | 0.040054197 | 0.051536128 |
| 250      | 0.068619219 | 0.049449440 | 0.040339403 | 0.051700190 |
| 300      | 0.068745562 | 0.049509093 | 0.040110908 | 0.051700190 |
| 350      | 0.068455005 | 0.049468688 | 0.040035246 | 0.051616674 |
| 400      | 0.068745656 | 0.049566532 | 0.040067145 | 0.051615889 |
| 450      | 0.068570272 | 0.049617624 | 0.040127401 | 0.051615889 |
| 500      | 0.068618198 | 0.049565727 | 0.039979232 | 0.051655221 |
| 550      | 0.068658518 | 0.049593786 | 0.040110908 | 0.051716213 |
| 600      | 0.068706245 | 0.049606438 | 0.040099271 | 0.051615889 |
| 650      | 0.068472913 | 0.049628929 | 0.040099271 | 0.051716213 |
| 700      | 0.068814244 | 0.049476902 | 0.040109573 | 0.051716213 |
| 750      | 0.068707035 | 0.049628929 | 0.040032661 | 0.051648285 |
| 800      | 0.068685085 | 0.049364919 | 0.040214856 | 0.051750504 |
| 850      | 0.068690163 | 0.049430072 | 0.039974270 | 0.051652866 |
| 900      | 0.068707758 | 0.049537663 | 0.040099271 | 0.051615889 |
| 950      | 0.068701848 | 0.049393938 | 0.040148613 | 0.051655640 |
| 1000     | 0.068533125 | 0.049488026 | 0.040077462 | 0.051700190 |

Table 3: MAE obtained for different values of  $L$  by considering  $m_c = 8$  and the sample sizes  $n = 10$  and  $n = 50$ .

| n=10     |             |             |             |             |
|----------|-------------|-------------|-------------|-------------|
| L values | m = 4       | m = 8       | m = 16      | m = 32      |
| 100      | 0.055121580 | 0.016789957 | 0.019414837 | 0.026154745 |
| 150      | 0.055082742 | 0.016860055 | 0.020463381 | 0.026567874 |
| 200      | 0.054444113 | 0.015864028 | 0.018835251 | 0.026462550 |
| 250      | 0.055069380 | 0.016713569 | 0.019871740 | 0.026594106 |
| 300      | 0.054485073 | 0.016367850 | 0.019853507 | 0.026738133 |
| 350      | 0.055189594 | 0.017587452 | 0.019448385 | 0.026237730 |
| 400      | 0.055019006 | 0.015934872 | 0.019920420 | 0.026875568 |
| 450      | 0.054713186 | 0.016490724 | 0.019934674 | 0.026280418 |
| 500      | 0.055189288 | 0.016273133 | 0.019732631 | 0.026681412 |
| 550      | 0.054836997 | 0.016014315 | 0.019825123 | 0.026455151 |
| 600      | 0.054858070 | 0.016428943 | 0.019595581 | 0.026533181 |
| 650      | 0.054995108 | 0.016428895 | 0.019664885 | 0.026564603 |
| 700      | 0.054629365 | 0.016489076 | 0.019735842 | 0.026029188 |
| 750      | 0.054856907 | 0.016709172 | 0.019832785 | 0.026806468 |
| 800      | 0.054775048 | 0.016788874 | 0.019521586 | 0.026574314 |
| 850      | 0.055063353 | 0.016686573 | 0.019903785 | 0.026610019 |
| 900      | 0.054661334 | 0.016651362 | 0.019802436 | 0.026478461 |
| 950      | 0.054942532 | 0.016801348 | 0.019524561 | 0.026358301 |
| 1000     | 0.054737599 | 0.016525393 | 0.019627528 | 0.026316266 |
| n=50     |             |             |             |             |
| L values | m = 4       | m = 8       | m = 16      | m = 32      |
| 100      | 0.012389634 | 0.014378597 | 0.016346480 | 0.005987124 |
| 150      | 0.012845588 | 0.013487204 | 0.016044449 | 0.006514487 |
| 200      | 0.012529827 | 0.013781535 | 0.016310423 | 0.006309129 |
| 250      | 0.012643199 | 0.013410669 | 0.016438114 | 0.006138570 |
| 300      | 0.012626224 | 0.014027554 | 0.016211230 | 0.006317077 |
| 350      | 0.012565908 | 0.013624478 | 0.016106788 | 0.006408499 |
| 400      | 0.012497260 | 0.013582925 | 0.016144317 | 0.006228219 |
| 450      | 0.012549399 | 0.013530021 | 0.016143322 | 0.006086537 |
| 500      | 0.012367086 | 0.013401940 | 0.016141858 | 0.006349109 |
| 550      | 0.012478901 | 0.013735523 | 0.016148057 | 0.006133311 |
| 600      | 0.012575963 | 0.013727710 | 0.015924829 | 0.006150113 |
| 650      | 0.012406790 | 0.013679476 | 0.015832550 | 0.006291790 |
| 700      | 0.012361329 | 0.013702765 | 0.016065679 | 0.006370769 |
| 750      | 0.012591359 | 0.013581635 | 0.016056227 | 0.006241175 |
| 800      | 0.012627465 | 0.013626546 | 0.016348414 | 0.006344578 |
| 850      | 0.012589741 | 0.013679997 | 0.016154883 | 0.006315521 |
| 900      | 0.012400539 | 0.013581913 | 0.016144224 | 0.006270848 |
| 950      | 0.012714286 | 0.013548530 | 0.016227546 | 0.006106073 |
| 1000     | 0.012525310 | 0.013373894 | 0.015997688 | 0.006328456 |

Table 4: MAE obtained for different values of  $L$  by considering  $m_c = 8$  and the sample sizes  $n = 100$  and  $n = 200$ .

| n=100    |             |             |             |             |
|----------|-------------|-------------|-------------|-------------|
| L values | m = 4       | m = 8       | m = 16      | m = 32      |
| 100      | 0.017478142 | 0.023298946 | 0.011639431 | 0.007226465 |
| 150      | 0.017504665 | 0.023831008 | 0.011615005 | 0.007020751 |
| 200      | 0.017347558 | 0.023896156 | 0.011965275 | 0.007119573 |
| 250      | 0.017055132 | 0.023697194 | 0.011933227 | 0.007241848 |
| 300      | 0.017297420 | 0.023730095 | 0.011731473 | 0.007061526 |
| 350      | 0.017517888 | 0.023597261 | 0.011820039 | 0.007203191 |
| 400      | 0.017479327 | 0.023599011 | 0.011677016 | 0.007240931 |
| 450      | 0.017317435 | 0.023874208 | 0.011614493 | 0.007141878 |
| 500      | 0.017059635 | 0.023509867 | 0.011812953 | 0.007206306 |
| 550      | 0.017072872 | 0.024041694 | 0.011687009 | 0.007202986 |
| 600      | 0.017148568 | 0.023595875 | 0.011809882 | 0.007229320 |
| 650      | 0.017190565 | 0.023723113 | 0.011641495 | 0.007084835 |
| 700      | 0.017188677 | 0.023643264 | 0.011745399 | 0.007153466 |
| 750      | 0.017168542 | 0.023465625 | 0.011816846 | 0.007170712 |
| 800      | 0.017249045 | 0.023787240 | 0.011667448 | 0.007224234 |
| 850      | 0.017385527 | 0.023708325 | 0.011784952 | 0.007184772 |
| 900      | 0.017383595 | 0.023508001 | 0.011732255 | 0.007203166 |
| 950      | 0.017193765 | 0.023460047 | 0.011758893 | 0.007148787 |
| 1000     | 0.017230682 | 0.023610863 | 0.011769666 | 0.007163527 |
| n=200    |             |             |             |             |
| L values | m = 4       | m = 8       | m = 16      | m = 32      |
| 100      | 0.009805856 | 0.008268677 | 0.009024516 | 0.007869445 |
| 150      | 0.010201032 | 0.008359005 | 0.008951202 | 0.007902837 |
| 200      | 0.009806975 | 0.008283252 | 0.009280869 | 0.007889820 |
| 250      | 0.009733988 | 0.008287597 | 0.009163627 | 0.007768234 |
| 300      | 0.009604532 | 0.008237118 | 0.009182839 | 0.007852535 |
| 350      | 0.009617489 | 0.008294073 | 0.009226847 | 0.007886357 |
| 400      | 0.009839392 | 0.008272793 | 0.009203195 | 0.007829124 |
| 450      | 0.009801435 | 0.008273763 | 0.009196935 | 0.007859767 |
| 500      | 0.009811608 | 0.008268882 | 0.009301848 | 0.007897819 |
| 550      | 0.009796365 | 0.008308688 | 0.009194947 | 0.007747985 |
| 600      | 0.009628443 | 0.008306949 | 0.009229040 | 0.007822580 |
| 650      | 0.009646638 | 0.008270202 | 0.009222904 | 0.007815548 |
| 700      | 0.009464440 | 0.008293359 | 0.009288022 | 0.007798927 |
| 750      | 0.009617270 | 0.008279542 | 0.009215189 | 0.007807101 |
| 800      | 0.009672819 | 0.008311923 | 0.009211411 | 0.007888251 |
| 850      | 0.009746441 | 0.008296962 | 0.009151720 | 0.007820409 |
| 900      | 0.009713779 | 0.008281549 | 0.009284245 | 0.007810474 |
| 950      | 0.009719215 | 0.008283652 | 0.009285797 | 0.007802866 |
| 1000     | 0.009829891 | 0.008285506 | 0.009201503 | 0.007792199 |
